# Supplementary material for: Exploitation of Selected Sourdough Saccharomyces cerevisiae Strains for the Production of a Craft Raspberry Fruit Beer
Source: MDPI journal article supplement (doi:10.3390/foods12183354), 2023-09-07
Supplement: s1 [file s1]

**Table S1.** Kinetic parameters of CO<sub>2</sub> production during 7 days of fermentation in malt wort by the 5 *S. cerevisiae* strains inoculated at 2x10<sup>6</sup> CFU/mL.

| Kinetic parameters |                                                          |             |                               |                |
|--------------------|----------------------------------------------------------|-------------|-------------------------------|----------------|
| Strain             | $\mu$ max<br>(dCO <sub>2</sub> /100 mL h <sup>-1</sup> ) | Lag (h)     | C<br>(CO <sub>2</sub> /100mL) | R <sup>2</sup> |
| US-05              | 2.35±0.20 <sup>b</sup>                                   | 0.80±0.10   | 4.41±0.15 <sup>b</sup>        | 0.99           |
| SD9                | 2.89 ± 0.11 <sup>b</sup>                                 | 0.83 ± 0.02 | 3.44 ± 0.04 <sup>a</sup>      | 0.99           |
| WN3                | 1.57±0.21 <sup>a</sup>                                   | 0.64±0.18   | 3.10±0.18 <sup>a</sup>        | 0.99           |
| SD19               | 2.40±0.13 <sup>b</sup>                                   | 0.58±0.06   | 4.09±0.09 <sup>b</sup>        | 0.99           |
| SD12               | 2.89±0.10 <sup>b</sup>                                   | 0.83±0.02   | 3.44±0.04 <sup>a</sup>        | 0.99           |

Values in the same column with different letters (a–d) are significantly different (p<0.05). The data are the means of three independent experiments ± standard deviations.
