# Supplementary material for: Exploitation of Selected Sourdough Saccharomyces cerevisiae Strains for the Production of a Craft Raspberry Fruit Beer
Source: MDPI journal article supplement (doi:10.3390/foods12183354), 2023-09-07
Supplement: s1 [file s1]

**Table S2.** Results of two-way ANOVA for the considered parameters (inoculated *S. cerevisiae* strain, raspberry addition, and their interaction) on beer characteristics. Ns: not significant ( $p < 0.05$ ).

|                                         | <b>Strain</b> | <b>Raspberry<br/>addition</b> | <b>Interaction</b> |
|-----------------------------------------|---------------|-------------------------------|--------------------|
|                                         | p-value       | p-value                       | p-value            |
| Maltotriose                             | ns            | 0.0022                        | 0.0028             |
| Maltose                                 | ns            | 0.0026                        | 0.0461             |
| Fructose                                | 0.0002        | 0.0233                        | 0.0195             |
| Total sugars                            | 0.0088        | 0.0013                        | 0.0181             |
| Glycerol                                | 0.012         | <0.0001                       | ns                 |
| Ethanol                                 | ns            | 0.0008                        | ns                 |
| pH                                      | 0.002         | <0.0001                       | ns                 |
| Total phenolic<br>content (mg<br>GAE/L) | ns            | ns                            | ns                 |
| FAN (mg/L)                              | <0.0001       | <0.0001                       | 0.0002             |
